# Supplementary material for: A magnesium carbonate recyclable template to synthesize micro hollow structures at a large scale
Source: Royal Society of Chemistry journal article supplement (doi:10.1039/c1cc15186j), 2011-01-01
Supplement: c1cc15186j.pdf [file c1cc15186j.pdf]

## Supplementary Information for

# Magnesium carbonate recyclable template to synthesize micro hollow structures at large scale

*Peng Tian, Junwei Ye\*, Nuo Xu, Weitao Gong, Qiushuang Zhang, Yuan Lin and Guiling Ning\**

*State Key Laboratory of Fine Chemicals, School of Chemical Engineering Dalian University of Technology, Dalian 116023, China*

*E-mail: junweiye@dlut.edu.cn; ninggl@dlut.edu.cn*

### CAPTIONS:

#### Experimental Section and characterizations

**Fig. S1** EDX patterns of the TiO<sub>2</sub> microtubes show that the samples contain Ti and O.

**Fig. S2** XRD patterns of the MgCO<sub>3</sub>·3H<sub>2</sub>O template: (a) the initial template, (b) the twice born template; (c) the fifth-born template.

**Fig. S3** XRD patterns of the MgCO<sub>3</sub> microcubes (a) and TiO<sub>2</sub> microboxes (b).

**Fig. S4** SEM image (a) and XRD pattern (c) of the twice-born MgCO<sub>3</sub> template; SEM image (b) and XRD pattern (d) of the TiO<sub>2</sub> microboxes prepared by the twice-born MgCO<sub>3</sub> template.

**Fig. S5** SEM images of the Al<sub>2</sub>O<sub>3</sub> microtubes (a) and the SiO<sub>2</sub> microtubes (b) with the insert of TEM images of the samples; EDX patterns of the Al<sub>2</sub>O<sub>3</sub> microtubes (c) and SiO<sub>2</sub> microtubes (d); XRD patterns of the Al<sub>2</sub>O<sub>3</sub> microtubes (e) and the SiO<sub>2</sub> microtubes (f).

**Fig. S6** SEM images of Gd<sub>2</sub>O<sub>3</sub> (a) and NiO (b) microtubes; XRD patterns of Gd<sub>2</sub>O<sub>3</sub> (c) and NiO (d) microtubes. The inserts in (a) and (b) are the TEM images of the samples with the scale bar of 200 nm.

**Fig. S7** (a) SEM image of the SiO<sub>2</sub> microboxes; (b) XRD pattern of the SiO<sub>2</sub> microboxes. The insert of (a) is the TEM image of the sample, and the scale bar is 50 nm.

**Table. S1** The analysis of filtrate and starting materials.

## Experimental Section

**Synthesis of  $\text{MgCO}_3 \cdot 3\text{H}_2\text{O}$  template:** In a typical synthesis, a  $\text{Mg}(\text{HCO}_3)_2$  glycol-water (v/v = 1:1) solution (0.2 mol/L, 100 mL) was transferred to a 250 mL three-necked flask. The solution was stirred and heated to 45 °C by water bath, then a variable amount of ammonia (2.0 mol/L, 0-10ml) was added into the vigorously stirred (~300 rpm) mixture. After stirring, the mixture was maintained for 15 min. Then a white precipitation was collected, filtered off, and washed with water and ethanol three times. The products were dried in blast drying oven at 55 °C for 4 h.

**Synthesis of  $\text{MgCO}_3 \cdot 3\text{H}_2\text{O} @ \text{TiO}_2 \cdot x\text{H}_2\text{O}$ :** The as-prepared  $\text{MgCO}_3 \cdot 3\text{H}_2\text{O}$  microrods (1.0 g) were dispersed in tetrabutyl titanate-ethanol solution (1.2 mL/75 mL). A 1:5 (v/v) mixture of water and ethanol was added dropwise into the suspension of nesquehonite with vigorous stirring. Thereafter, the suspension was stirred for a further 4 h before centrifugation and washing with ethanol and water.

**Synthesis of  $\text{MgCO}_3 \cdot 3\text{H}_2\text{O} @ \text{SiO}_2 \cdot x\text{H}_2\text{O}$ :** The as-prepared  $\text{MgCO}_3 \cdot 3\text{H}_2\text{O}$  microrods (1.0 g) was redispersed in ethanol-water solution (90 mL/10 mL). The ammonia (1.0 mL, 25 wt%) was then added and the mixture was stirred for 5 min. TEOS was added quickly and the mixture reacted at 25 °C. Thereafter, the suspension was stirred for further 4 h before centrifugation and washing with water and ethanol.

**Synthesis of magnesium carbonate@ $\text{Al}_2\text{O}_3 \cdot x\text{H}_2\text{O}$ :** The as-prepared  $\text{MgCO}_3 \cdot 3\text{H}_2\text{O}$  microrod was dried in blast drying oven at 60 °C for 2 h, then were dispersed in isopropanol. The aluminium isopropoxide-isopropanol solution (25 wt%, 10 mL) were then added into the vigorously stirred mixture by injector, and the mixture was heated from room temperature to 55 °C at the rate of 3 °C/quarter on anhydrous condition. Thereafter, the suspension was stirred for a further 12 h, and then centrifugated and washed with isopropanol and ethanol.

**Synthesis of  $\text{MgCO}_3 \cdot 3\text{H}_2\text{O} @ \text{gadolinium carbonate}$ :** The as-prepared  $\text{MgCO}_3 \cdot 3\text{H}_2\text{O}$  microrods (0.6 g, 1.5 mmol) was redispersed in ethanol (50 mL). The  $\text{Gd}(\text{NO}_3)_3$  (5.0 mL, 0.4 mol/L) was then added and the mixture was stirred for a further 1 h at 25 °C, and then centrifugated and washed with water and ethanol.

**Synthesis of  $\text{MgCO}_3 \cdot 3\text{H}_2\text{O}$ @nickel carbonate:** The as-prepared  $\text{MgCO}_3 \cdot 3\text{H}_2\text{O}$  microrods (0.6 g, 1.5 mmol) was redispersed in ethanol (50 mL). The  $\text{Ni}(\text{NO}_3)_2$  (2.0 mL, 1.0 mol/L) was then added and the mixture was stirred for a further 4 h at 45 °C before centrifugation and washing with water and ethanol.

**Synthesis of  $\text{TiO}_2$ ,  $\text{Al}_2\text{O}_3$ ,  $\text{SiO}_2$ ,  $\text{Gd}_2\text{O}_3$  and NiO microcubes:** The as-prepared core-shell samples were dispersed in glycol-water solution under stirring for 30 min, while carbon dioxide was flowed into the solution. After three cycles of centrifugation/washing/redispersion with water and ethanol, the samples obtained were dried. Finally the precursors were heated in muffle furnace.

**Synthesis of  $\text{MgCO}_3$  microcubes:** In typical procedure, a  $\text{Mg}(\text{HCO}_3)_2$  aqueous solution (0.4 mol/L, 30 mL) containing  $\text{NH}_4\text{Cl}$  was transferred to an autoclave (50 mL capacity) and hydrothermally treated at 160 °C for 24 h. The white product was collected, filtered off, and washed with water and ethanol three times. The products were dried in blast drying oven at 60 °C for 4 h, and  $\text{MgCO}_3$  microcubes was obtained. To increase etching rate,  $\text{MgCO}_3$  template need to be heated to 550 °C and maintained for 1h before being used.

**Synthesis of  $\text{TiO}_2$  microboxes:** The as-prepared template (1.2 g) were dispersed in tetrabutyl titanate-ethanol solution (0.6 mL/50 mL). A mixture of water and ethanol (1:5 (v/v)) was added dropwise to the suspension of  $\text{MgCO}_3 \cdot 3\text{H}_2\text{O}$  with vigorous stirring. Thereafter, the suspension was stirred for a further 4 h before filtering and washing with water and ethanol. The as-prepared core-shell samples were dispersed in an  $\text{NH}_4\text{Cl}$  aqueous solution under stirring for 30 min, while carbon dioxide was flowed into the water. After three cycles of centrifugation/washing/redispersion with water and ethanol, the samples obtained were dried. Finally the precursors were heated in muffle furnace.

**Synthesis of  $\text{SiO}_2$  microboxes:** The as-prepared template (1.2 g) was redispersed in ethanol-water solution (45 mL/15 mL). The ammonia (1.0 mL, 25 wt%) was then added and the mixture was stirred for 5 min. TEOS (0.5ml) was added quickly and the mixture reacted at 25 °C. Thereafter, the suspension was stirred for a further 4 h, and then filtered and washed with water and ethanol. The as-prepared core-shell samples

were dispersed in  $\text{NH}_4\text{Cl}$  aqueous under stirring for 30 min, while carbon dioxide was flowed into the mixture. After three cycles of centrifugation/washing/redispersion with water and ethanol, the samples obtained were dried. Finally the precursors were heated in muffle furnace.

**Synthesis of the twice-born magnesium carbonate template:** Magnesium carbonate were recycled by preparation from raw materials of magnesium hydrogen carbonate filtrate as described previously.

## Characterizations

The samples were characterized by XRD (Rigaku-DMax 2400) in reflection mode (Cu  $\text{K}\alpha$  radiation) at scanning rate of  $0.02 \text{ S}^{-1}$  in the  $2\theta$  from 5 to  $80^\circ$ . The shape and structure of the products were observed with a scanning electron microscope (JEOL-5600LV, operated at 15 kV; S-4800, operated at 5kV) and a transmission electron microscope (TEM; Philips TecnaiG2 20, operated at 200 kV). EDX was performed during SEM (JEOL-5600LV). The  $\text{Mg}^{2+}$  concentration of filtrate was measured by EDTA titration method, and the pH was measured by pH-meter (SHANGHAILEICI, PHS-3C).

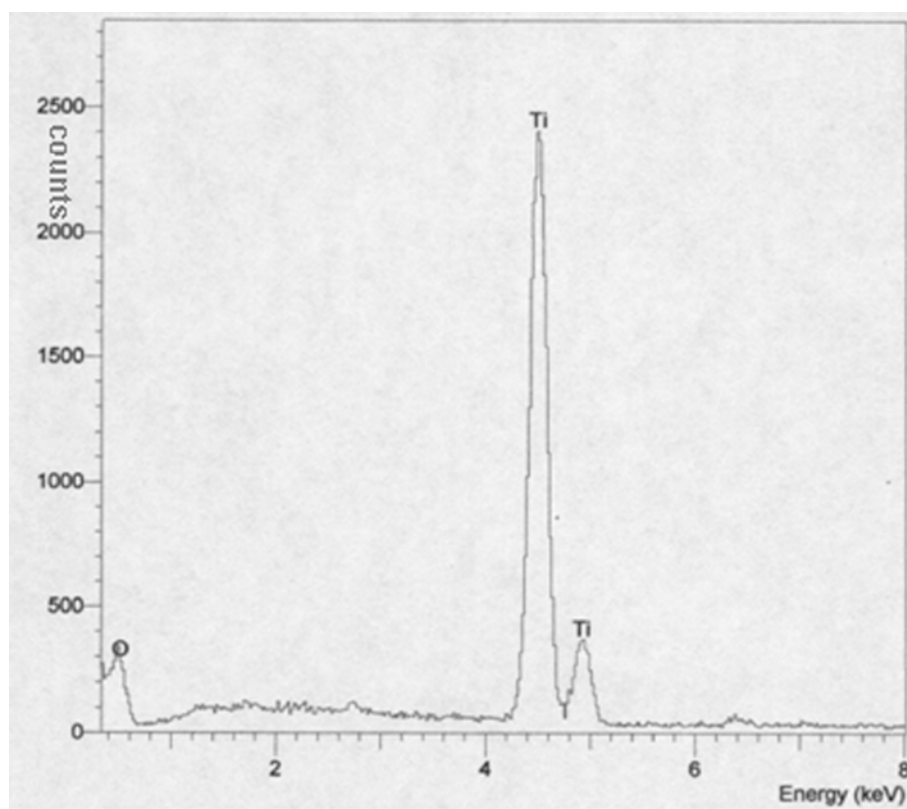

**Fig. S1** EDX patterns of the TiO<sub>2</sub> microtubes show that the samples contain Ti and O.

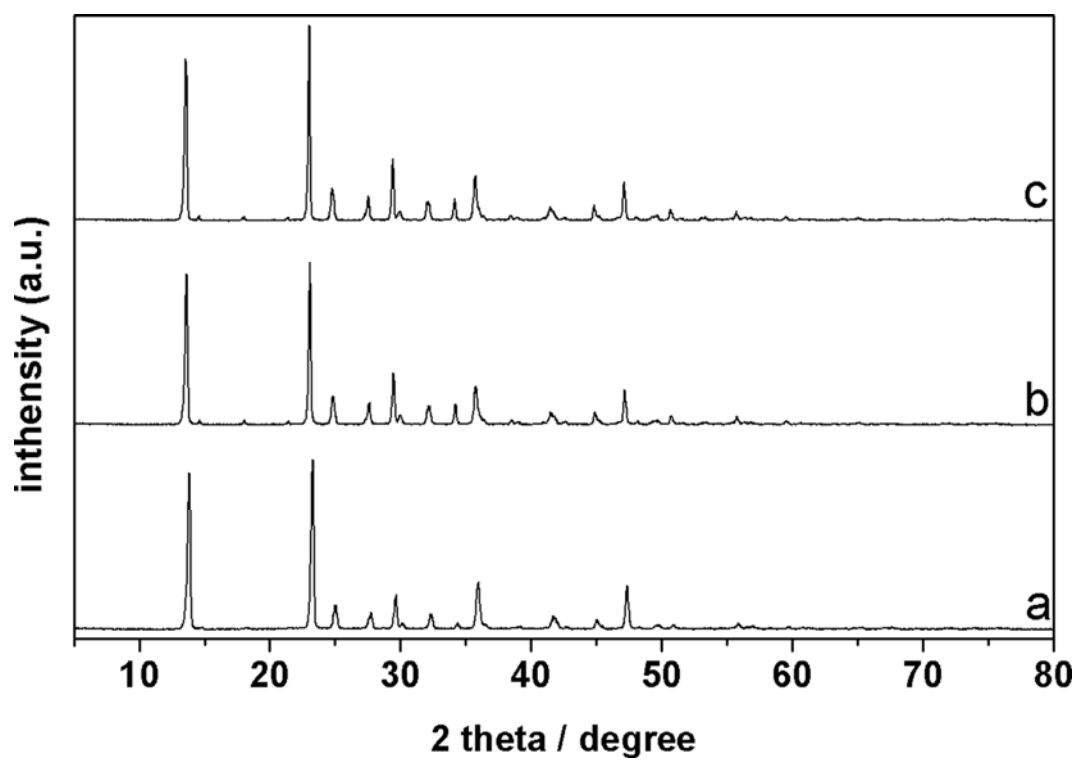

**Fig. S2** XRD patterns of the MgCO<sub>3</sub>·3H<sub>2</sub>O template: (a) the initial template, (b) the twice born template; (c) the fifth-born template.

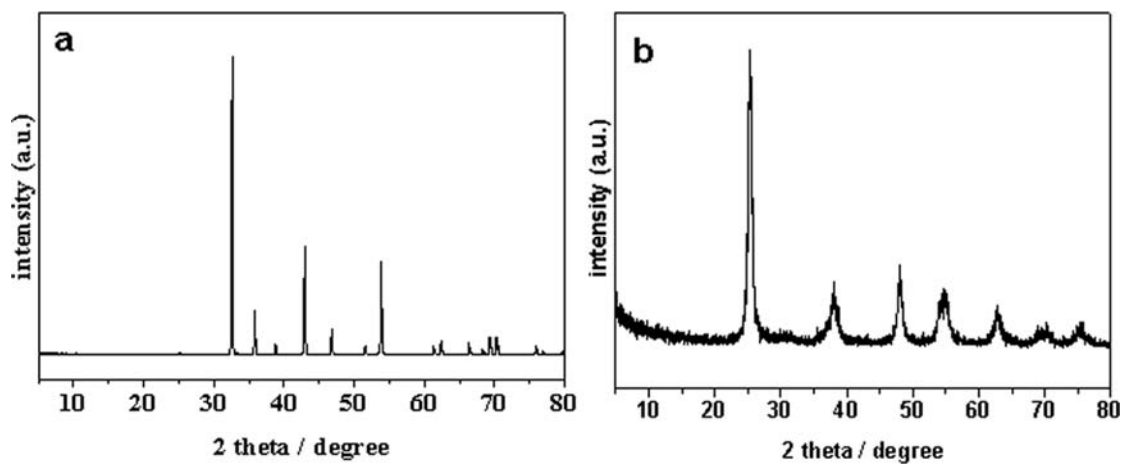

**Fig. S3** XRD patterns of the MgCO<sub>3</sub> microcubes (a) and TiO<sub>2</sub> microboxes (b).

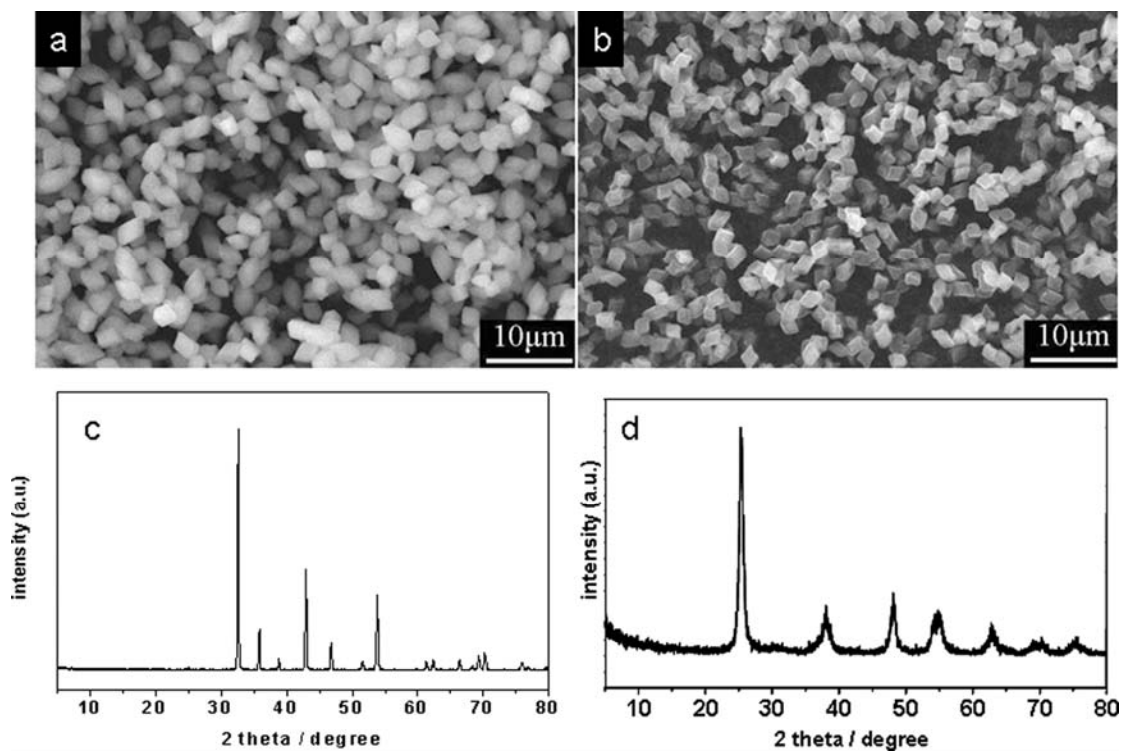

**Fig. S4** SEM image (a) and XRD pattern (c) of the twice-born  $\text{MgCO}_3$  template; SEM image (b) and XRD pattern (d) of the  $\text{TiO}_2$  microboxes prepared by the twice-born  $\text{MgCO}_3$  template.



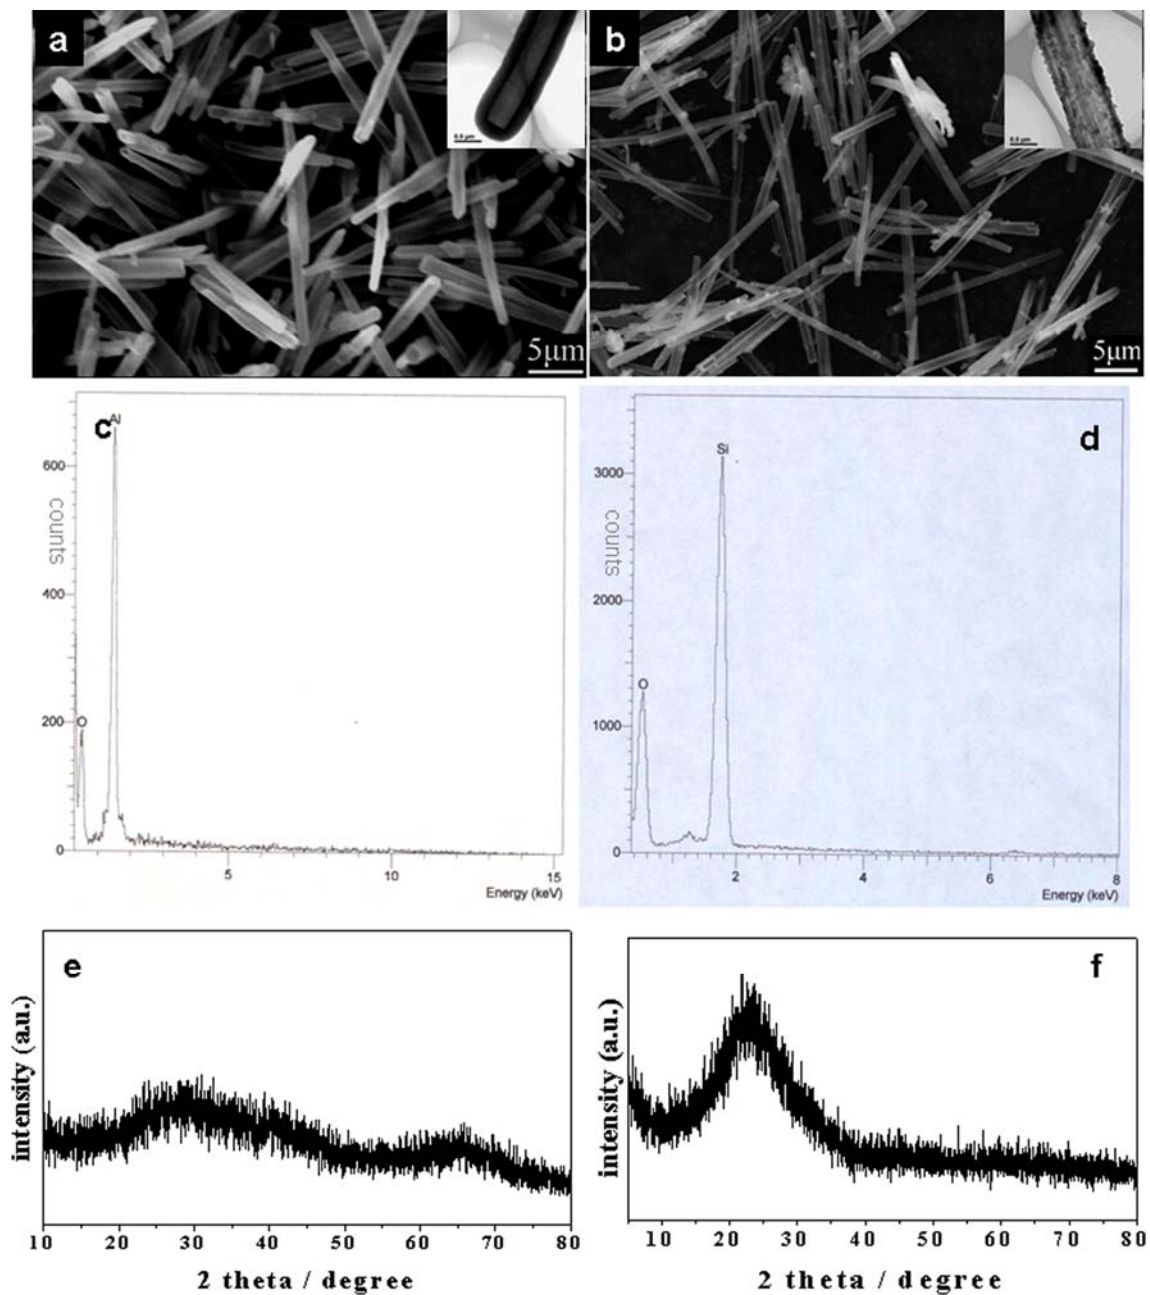

**Fig. S5** SEM images of the Al<sub>2</sub>O<sub>3</sub> microtubes (a) and the SiO<sub>2</sub> microtubes (b) with the insert of TEM images of the samples; EDX patterns of the Al<sub>2</sub>O<sub>3</sub> microtubes (c) and SiO<sub>2</sub> microtubes (d); XRD patterns of the Al<sub>2</sub>O<sub>3</sub> microtubes (e) and the SiO<sub>2</sub> microtubes (f).

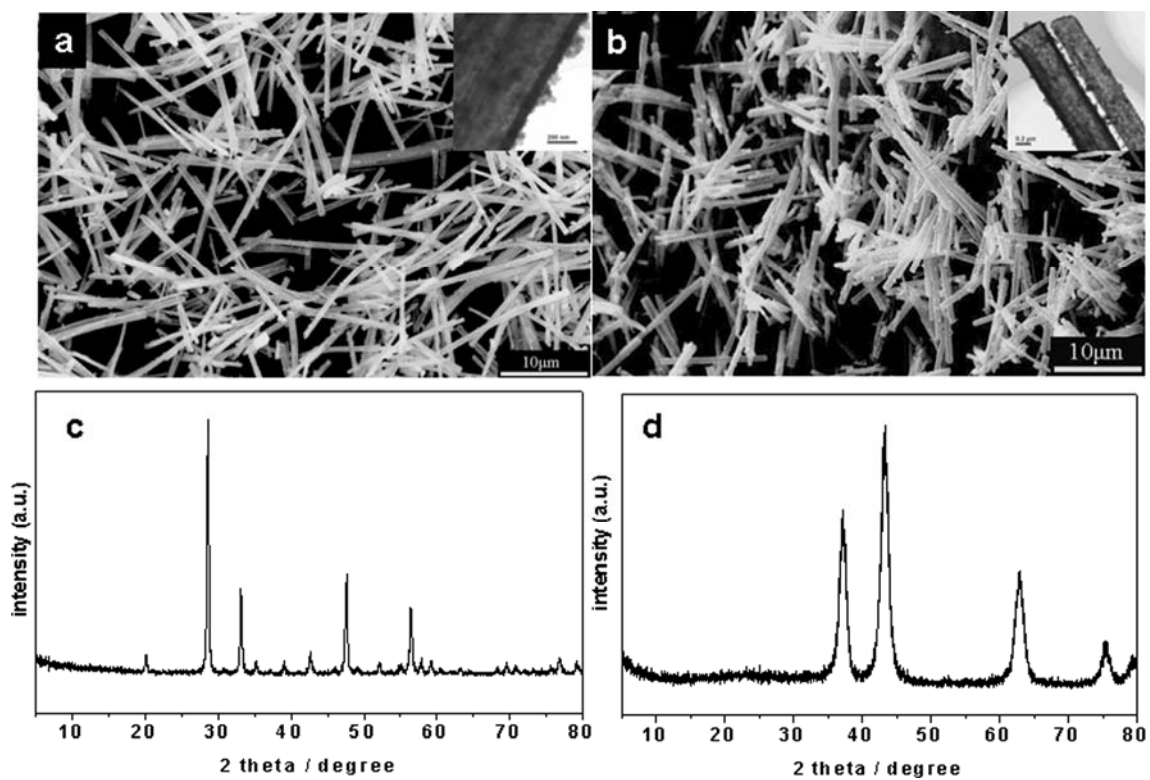

**Fig. S6** SEM images of Gd<sub>2</sub>O<sub>3</sub> (a) and NiO (b) microtubes; XRD patterns of Gd<sub>2</sub>O<sub>3</sub> (c) and NiO (d) microtubes. The inserts in (a) and (b) are the TEM images of the samples with the scale bar of 200 nm.

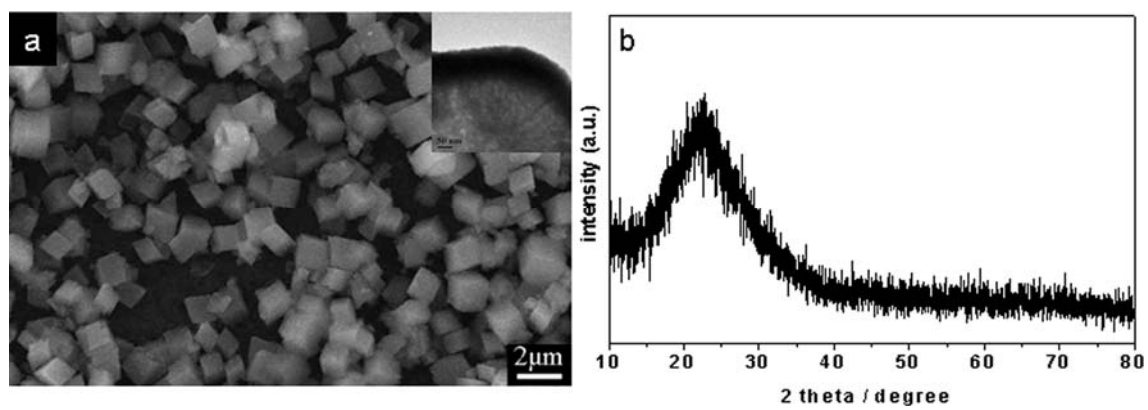

**Fig. S7** (a) SEM image of the SiO<sub>2</sub> microboxes; (b) XRD pattern of the SiO<sub>2</sub> microboxes. The insert of (a) is the TEM image of the sample, and the scale bar is 50 nm.

**Table. S1** The analysis of filtrate and starting materials.

| Sample             | $C(\text{Mg}^{2+})$ | pH   |
|--------------------|---------------------|------|
| Starting materials | 0.203M              | 7.15 |
| Sample             |                     |      |
| Once-filtrate      | 0.205M              | 7.20 |
| Sample             |                     |      |
| Fourth-filtrate    | 0.198M              | 7.13 |
| Sample             |                     |      |
